# Supplementary material for: Robust synthesis of F-BODIPYs
Source: Royal Society of Chemistry journal article supplement (doi:10.1039/c6ob02238c), 2016-01-01

# Robust Synthesis of *F*-BODIPYs

Michael Helmut Reynolds Beh, Katherine Isabelle Biehn Douglas, Kelsey Taylor Elver House,  
Alexandra Celeste Murphy, Jackson Scott Testemale Sinclair and Alison Thompson\*

Department of Chemistry, Dalhousie University, P.O. Box 15000, Halifax, NS, B3H 4R2, Canada  
[Alison.Thompson@dal.ca](mailto:Alison.Thompson@dal.ca)

## Supporting Information

### Table of contents

|                                                                                                                                   |    |
|-----------------------------------------------------------------------------------------------------------------------------------|----|
| Determination of yield of <i>F</i> -BODIPYs employing <sup>1</sup> H NMR spectroscopy.....                                        | 2  |
| Calculation of NMR-based yield .....                                                                                              | 2  |
| Effect of varying NEt <sub>3</sub> in the synthesis of <i>F</i> -BODIPYs .....                                                    | 4  |
| Synthetic methods .....                                                                                                           | 5  |
| Optimised “rescue” procedure for the synthesis of <i>F</i> -BODIPYs (GP1) .....                                                   | 5  |
| General procedure for the synthesis of <i>F</i> -BODIPYs with added water (GP2) .....                                             | 5  |
| General procedure for the synthesis of <i>F</i> -BODIPYs (GP3, anhydrous).....                                                    | 6  |
| <sup>1</sup> H, <sup>13</sup> C, <sup>11</sup> B and <sup>19</sup> F NMR spectra .....                                            | 8  |
| 4,4-Difluoro-1,3,5,7-tetramethyl-2,6-di(2-methoxy-2-oxoethyl)-8-H-4-bora-3a,4a-diaza- <i>s</i> -indacene (5BF <sub>2</sub> )..... | 8  |
| <sup>1</sup> H NMR; 500 MHz, CDCl <sub>3</sub> .....                                                                              | 8  |
| <sup>13</sup> C NMR; 125 MHz, CDCl <sub>3</sub> .....                                                                             | 8  |
| <sup>11</sup> B NMR; 160 MHz, CDCl <sub>3</sub> .....                                                                             | 9  |
| <sup>19</sup> F NMR; 470 MHz, CDCl <sub>3</sub> .....                                                                             | 9  |
| 4,4-Difluoro-1,3,5,7-tetramethyl-2,6-diethoxycarbonyl-8-H-4-bora-3a,4a-diaza- <i>s</i> -indacene (6BF <sub>2</sub> ) .....        | 10 |
| <sup>1</sup> H NMR; 500 MHz, CDCl <sub>3</sub> .....                                                                              | 10 |
| <sup>13</sup> C NMR; 125 MHz, CDCl <sub>3</sub> .....                                                                             | 10 |
| <sup>11</sup> B NMR; 160 MHz, CDCl <sub>3</sub> .....                                                                             | 11 |
| <sup>19</sup> F NMR; 470 MHz, CDCl <sub>3</sub> .....                                                                             | 11 |

**Determination of yield of *F*-BODIPYs employing  $^1\text{H}$  NMR spectroscopy**

The reaction mixture was evaporated to dryness, and the residue was dissolved in a known volume of deuterated chloroform ( $\text{CDCl}_3$ ). A known volume of benzene was added as an internal standard. A known aliquot of the new mixture, containing benzene, was added to an NMR tube, and then diluted with a known amount of  $\text{CDCl}_3$  to reach a volume suitable for  $^1\text{H}$  NMR analysis. Figure S1 compares  $^1\text{H}$  NMR spectra for starting material (**1HBr**, top), the corresponding product (**1BF<sub>2</sub>**, middle) and the product mixture containing both **1HBr** and **1BF<sub>2</sub>** (bottom).

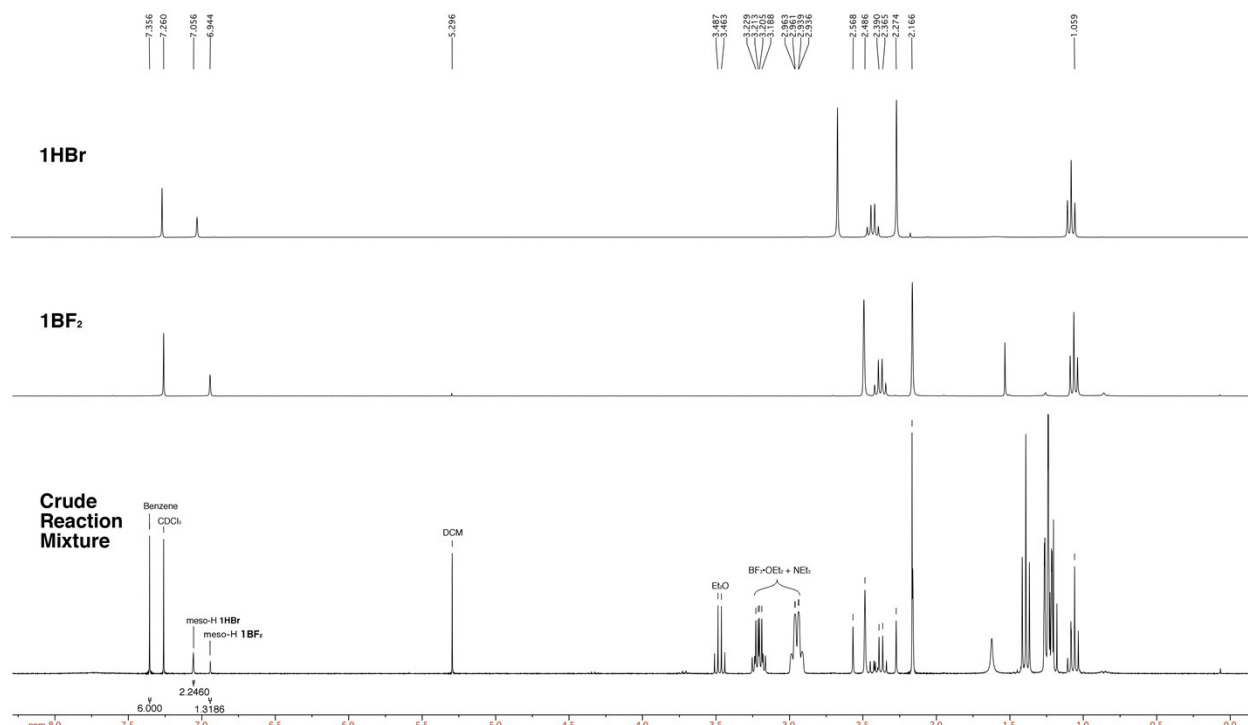

Figure S1:  $^1\text{H}$  NMR spectra, in  $\text{CDCl}_3$ , of **1HBr**, **1BF<sub>2</sub>** and the crude reaction mixture containing **1HBr**, **1BF<sub>2</sub>**,  $\text{NEt}_3$ ,  $\text{BF}_3 \cdot \text{OEt}_2$ ,  $\text{CH}_2\text{Cl}_2$  and benzene.

**Calculation of NMR-based yield**

The crude reaction mixture was dissolved in 4.000 mL of  $\text{CDCl}_3$  ( $V_{\text{CDCl}_3}$ ), to which 4  $\mu\text{L}$  of benzene ( $V_{\text{benz}}$ ) was added. The first step was to calculate the moles of benzene present ( $n_{\text{benz}}$ ). This required using density ( $d_{\text{benz}}$ , 0.876 g/mL), mass ( $m_{\text{benz}}$ ) and molar mass ( $\text{mm}_{\text{benz}}$ , 78.11 g/mol) of benzene as follows:

$$m = V_{\text{benz}} * d_{\text{benz}} = 3.50 \times 10^{-3} \text{ g}$$

$$n_{\text{benz}} = \frac{m_{\text{benz}}}{mm_{\text{benz}}} = 4.49 \times 10^{-5} \text{ mol}$$

Thus, we knew the number of moles of benzene in the 4 mL solution. The concentration of benzene ( $M_{\text{benz}}$ ) in this solution was calculated as follows:

$$M_{\text{benz}} = \frac{n_{\text{benz}}}{V_{\text{CDCl}_3}} = 0.0224 \text{ mol/L}$$

A 200  $\mu\text{L}$  aliquot of this solution ( $V_{\text{NMR}}$ ) was added to an NMR sample tube and diluted to 600  $\mu\text{L}$  for analysis. Using  $M_{\text{benz}}$ , the moles of benzene present in this aliquot ( $n_{\text{benz aliquot}}$ ) could be calculated. The integral value for the *meso*-H signal of **1BF<sub>2</sub>** ( $\int^{1\text{BF}_2}$ ) was calculated when the integration of benzene was set to 6.000. Multiplying  $n_{\text{benz aliquot}}$  by  $\int^{1\text{BF}_2}$  allowed us to calculate the moles of **1BF<sub>2</sub>** in the 200  $\mu\text{L}$  aliquot ( $n_{\text{BF aliquot}}$ ). This then allows us to calculate the concentration of **1BF<sub>2</sub>** in the original 4 mL solution ( $M_{\text{BF}}$ ):

$$n_{\text{benz aliquot}} = M_{\text{benz}} * V_{\text{NMR}} = 2.24 \times 10^{-6} \text{ mol}$$

$$n_{\text{BF aliquot}} = n_{\text{benz aliquot}} * \int^{1\text{BF}_2} = 2.96 \times 10^{-6} \text{ mol}$$

$$M_{\text{BF}} = \frac{n_{\text{BF aliquot}}}{V_{\text{NMR}}} = 0.0148 \text{ mol/L}$$

We were then able to work back and calculate the moles of **1BF<sub>2</sub>** produced during the reaction ( $n_{\text{BF}}$ ):

$$n_{\text{BF}} = M_{\text{BF}} * V_{\text{CDCl}_3} = 5.92 \times 10^{-5} \text{ mol}$$

The number of moles of **1BF<sub>2</sub>** could now be used to calculate the yield. In this case 0.160 mmol of starting material was used and 0.0592 mmol of **1BF<sub>2</sub>** were present, therefore the yield for this reaction was 37%.



Effect of varying NEt<sub>3</sub> in the synthesis of *F*-BODIPYs

Table S1: Effect of varying NEt<sub>3</sub> upon the yield of 1BF<sub>2</sub>

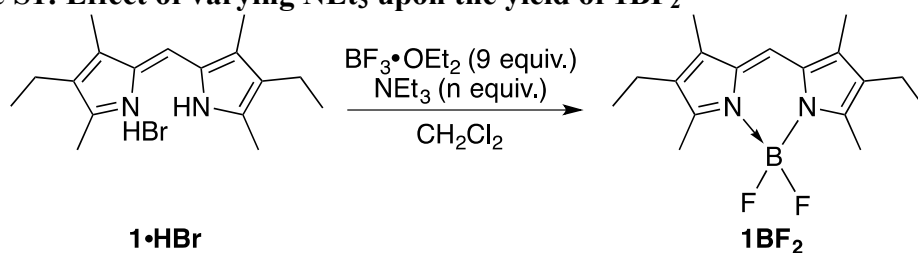

| 1•HBr                       |  | 1BF <sub>2</sub> |  |
|-----------------------------|--|------------------|--|
| Equiv. NEt <sub>3</sub> (n) |  | NMR yield (%)    |  |
| 1                           |  | 0                |  |
| 3                           |  | 32               |  |
| 5                           |  | 54               |  |
| 6                           |  | 86               |  |
| 7                           |  | 77               |  |
| 12                          |  | 37               |  |

## Synthetic methods

### Optimised “rescue” procedure for the synthesis of *F*-BODIPYs (GP1)

Naturally air-dried glassware was used, without any provision to exclude air or moisture from the reaction vessel. To a solution of dipyrin•HBr salt (0.16 mmol, 1 equiv) in CH<sub>2</sub>Cl<sub>2</sub> (13 mL, lab grade, non-anhydrous) under air with stirring at room temperature NEt<sub>3</sub> (6 equiv, lab grade, non-anhydrous) was added, and the reaction was stirred for 10 minutes. Anhydrous BF<sub>3</sub>•OEt<sub>2</sub> (9 equiv) was then added and the resulting solution was sealed with a septum and stirred for 1.25 h. The septum was then removed, and non-anhydrous lab-grade NEt<sub>3</sub> (6 equiv, lab grade, non-anhydrous) was added. The vessel was resealed and stirred for 5 minutes, after which the septum was again removed and anhydrous BF<sub>3</sub>•OEt<sub>2</sub> (9 equiv) was added. The resulting solution was sealed again and then stirred for another 1.25 h. The reaction mixture was concentrated *in vacuo* to yield the crude product, which was dissolved in ether (20 mL) and washed with 1 M hydrochloric acid (4 x 20 mL) and 5 M hydrochloric acid (1 x 20 mL). The organic fraction was dried over anhydrous Na<sub>2</sub>SO<sub>4</sub>, and concentrated *in vacuo*. The resulting residue was purified via column chromatography on silica, using CH<sub>2</sub>Cl<sub>2</sub> as eluent, to yield the desired *F*-BODIPY.

### General procedure for the synthesis of *F*-BODIPYs with added water (GP2)

Distilled water (2 equiv) was added to a solution of dipyrin•HBr salt (0.16 mmol, 1 equiv) in anhydrous CH<sub>2</sub>Cl<sub>2</sub> (13 mL) under N<sub>2</sub>, with stirring at room temperature until the water micelle was no longer visible (~45 min for 2 equiv). Anhydrous NEt<sub>3</sub> (6 equiv) was added, and the reaction was stirred for 10 minutes. BF<sub>3</sub>•OEt<sub>2</sub> (9 equiv) was then added and the resulting solution was stirred, under nitrogen, for 2.5 h. The reaction mixture was concentrated *in vacuo* to yield the crude product which was dissolved in CDCl<sub>3</sub> (4.000 mL) and benzene (4 μL) was added, with stirring. An aliquot (200 μL) of this solution was added to an NMR sample tube and diluted with CDCl<sub>3</sub> (400 μL). A <sup>1</sup>H NMR spectrum of the sample was collected and the NMR-

based yield was determined. To gain an isolated yield, the crude product was dissolved in ether (20 mL) and washed with 1 M hydrochloric acid (3 x 20 mL). The organic fraction was dried over anhydrous Na<sub>2</sub>SO<sub>4</sub>, and concentrated *in vacuo*. The resulting residue was purified via column chromatography on silica, using CH<sub>2</sub>Cl<sub>2</sub> as eluent, to yield the desired *F*-BODIPY.

**General procedure for the synthesis of *F*-BODIPYs (GP3, anhydrous)**

These experiments used strictly anhydrous protocols, conditions and reagents (i.e. our control reactions). To a solution of dipyrin•HBr salt (0.16 mmol, 1 equiv) in anhydrous CH<sub>2</sub>Cl<sub>2</sub> (12 mL) under N<sub>2</sub>, with stirring at room temperature, anhydrous NEt<sub>3</sub> (6 equiv) was added, and the reaction was stirred for 10 minutes. BF<sub>3</sub>•OEt<sub>2</sub> (9 equiv) was then added and the resulting solution was stirred, under N<sub>2</sub>, for 2.5 h. The reaction mixture was concentrated *in vacuo* to yield the crude product which was dissolved in ether (20 mL) and washed with 1 M hydrochloric acid (3 x 20 mL). The organic fraction was dried over anhydrous Na<sub>2</sub>SO<sub>4</sub>, and concentrated *in vacuo*. The resulting residue was purified via column chromatography on silica, using CH<sub>2</sub>Cl<sub>2</sub> as eluent, to yield the desired *F*-BODIPY.

**4,4-Difluoro-1,3,5,7-tetramethyl-2,6-diethyl-8-H-4-bora-3a,4a-diaza-s-indacene (1BF<sub>2</sub>)**

The title compound<sup>24</sup> was synthesised from **1HBr**<sup>18</sup> according to the GP3, and was isolated as a dark red solid (40 mg, 82%).

**4,4-Difluoro-1,2,3,5,6,7-hexamethyl-8-H-4-bora-3a,4a-diaza-s-indacene (2BF<sub>2</sub>)**

The title compound<sup>18</sup> was synthesised from **2HBr**<sup>18</sup> according to the GP3, and was isolated as a light orange solid (36 mg, 81%).

**4,4-Difluoro-1,3,5,7-tetramethyl-2,6-di-n-pentyl-8-H-4-bora-3a,4a-diaza-s-indacene (3BF<sub>2</sub>)**

The title compound<sup>25</sup> was synthesised from **3HBr**<sup>18</sup> according to the GP3, and was isolated as a dark red solid (47 mg, 76%).

**4,4-Difluoro-1,3,5,7-tetramethyl-6-ethyl-2,8-H-4-bora-3a,4a-diaza-s-indacene (4BF<sub>2</sub>)**

The title compound<sup>10</sup> was synthesised from **4HBr**<sup>19</sup> according to the GP3, and was isolated as a red solid (36 mg, 81%).

**4,4-Difluoro-1,3,5,7-tetramethyl-2,6-di(2-methoxy-2-oxoethyl)-8-H-4-bora-3a,4a-diaza-s-indacene (5BF<sub>2</sub>)**

The title compound was synthesised from **5HBr**<sup>20</sup> according to the GP3, and was isolated as an orange solid (45 mg, 72%).

**4,4-Difluoro-1,3,5,7-tetramethyl-2,6-diethoxycarbonyl-8-H-4-bora-3a,4a-diaza-s-indacene (6BF<sub>2</sub>)**

The title compound<sup>26</sup> was synthesised from **6HBr**<sup>21</sup> according to the GP3, and was isolated as a pale yellow/orange solid (33 mg, 53%).

**4,4-Difluoro-1,3,5,7-tetramethyl-2,6-diethyl-8-phenyl-4-bora-3a,4a-diaza-s-indacene (7BF<sub>2</sub>)**

The title compound<sup>10</sup> was synthesised from free-base **7**<sup>22</sup> according to the GP3, and was isolated as a dark red solid (56 mg, 92%).

**4,4-Difluoro-1,3,5,7,8-pentamethyl-2,6-diethyl-4-bora-3a,4a-diaza-s-indacene (8BF<sub>2</sub>)**

The title compound<sup>10</sup> was synthesised from **8HCl**<sup>23</sup> according to the GP3, and was isolated as a light orange solid (46 mg, 91%).



$^1\text{H}$ ,  $^{13}\text{C}$ ,  $^{11}\text{B}$  and  $^{19}\text{F}$  NMR spectra

**4,4-Difluoro-1,3,5,7-tetramethyl-2,6-di(2-methoxy-2-oxoethyl)-8-H-4-bora-3a,4a-diaza-s-indacene ( $5\text{BF}_2$ )**

$^1\text{H}$  NMR; 500 MHz,  $\text{CDCl}_3$

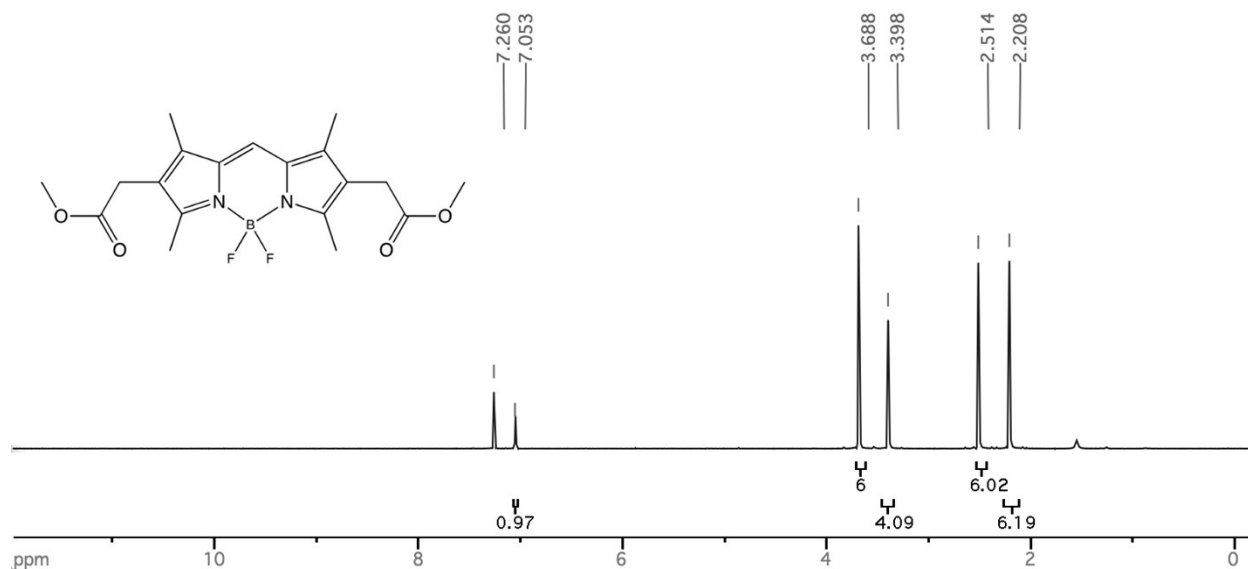

$^{13}\text{C}$  NMR; 125 MHz,  $\text{CDCl}_3$

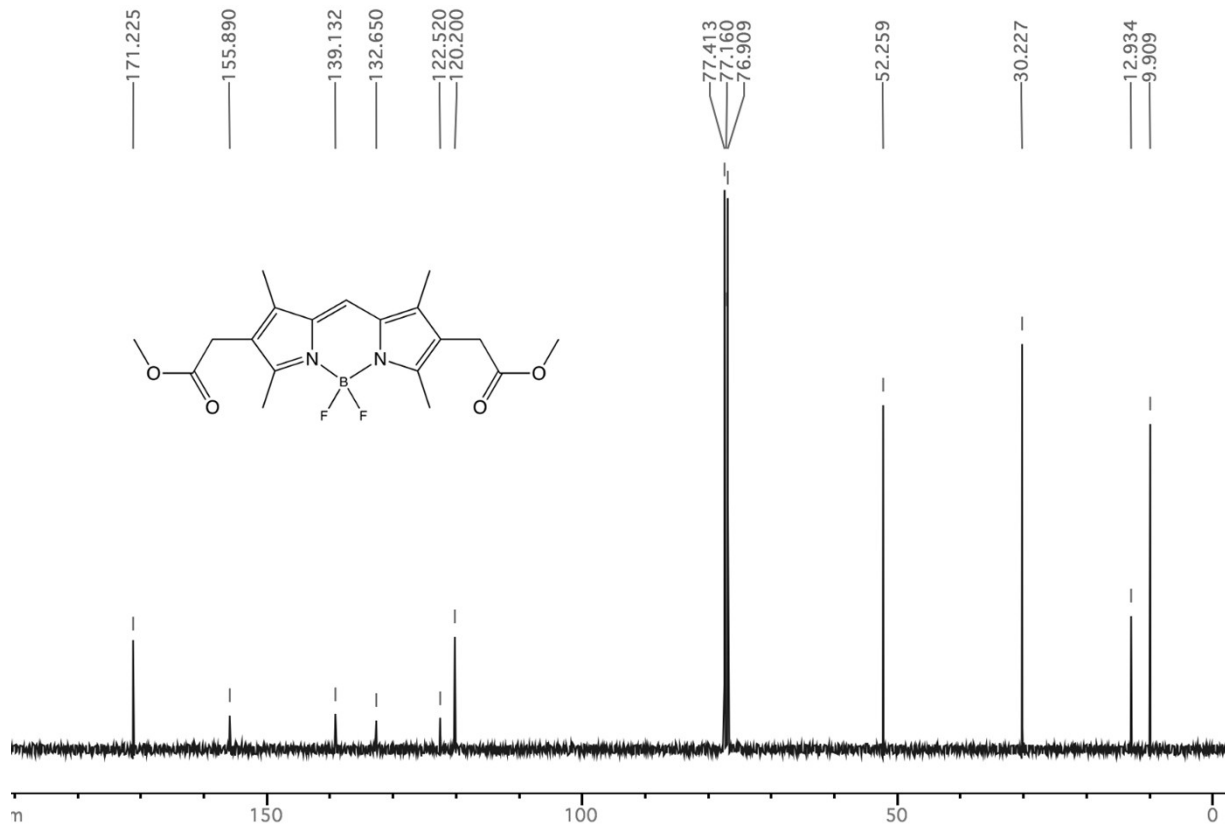

$^{11}\text{B}$  NMR; 160 MHz,  $\text{CDCl}_3$

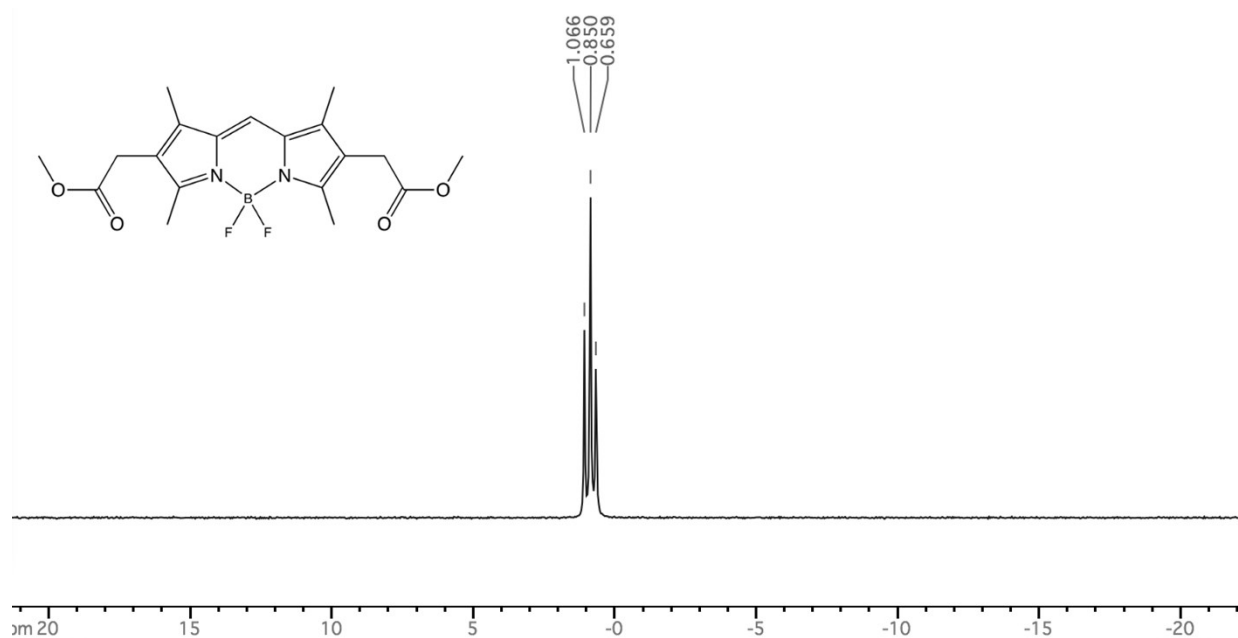

$^{19}\text{F}$  NMR; 470 MHz,  $\text{CDCl}_3$

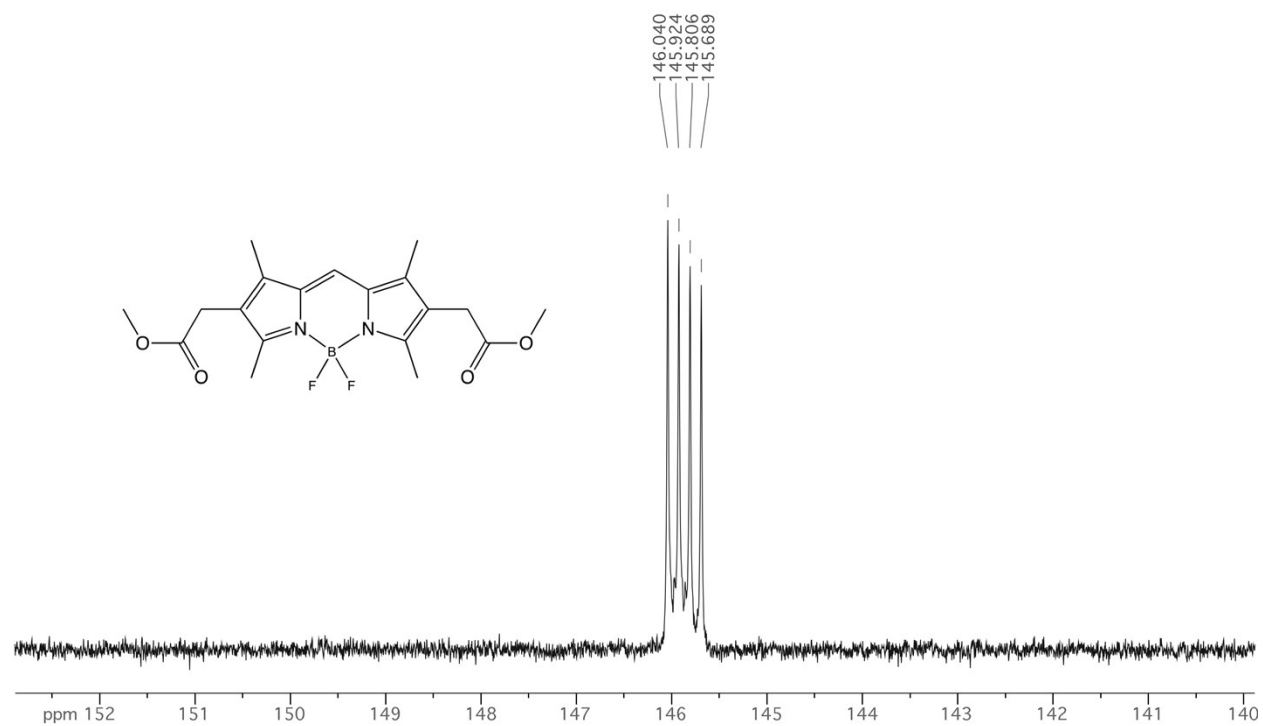

4,4-Difluoro-1,3,5,7-tetramethyl-2,6-diethoxycarbonyl-8-H-4-bora-3a,4a-diaza-s-indacene  
(6BF<sub>2</sub>)

<sup>1</sup>H NMR; 500 MHz, CDCl<sub>3</sub>

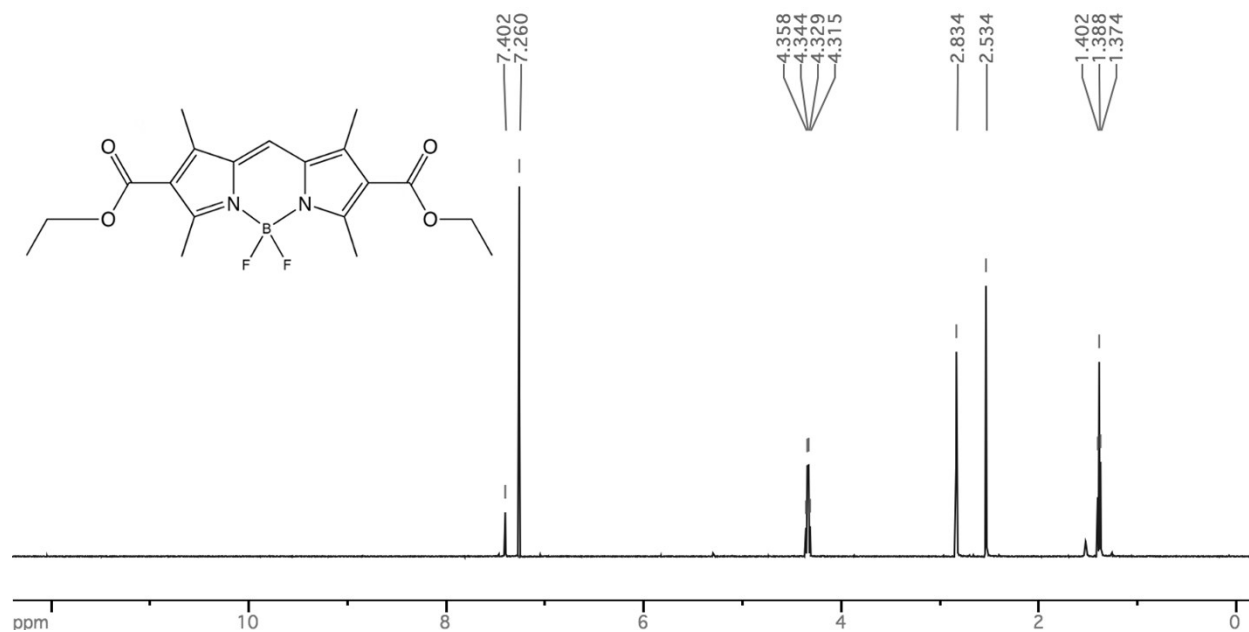

<sup>13</sup>C NMR; 125 MHz, CDCl<sub>3</sub>

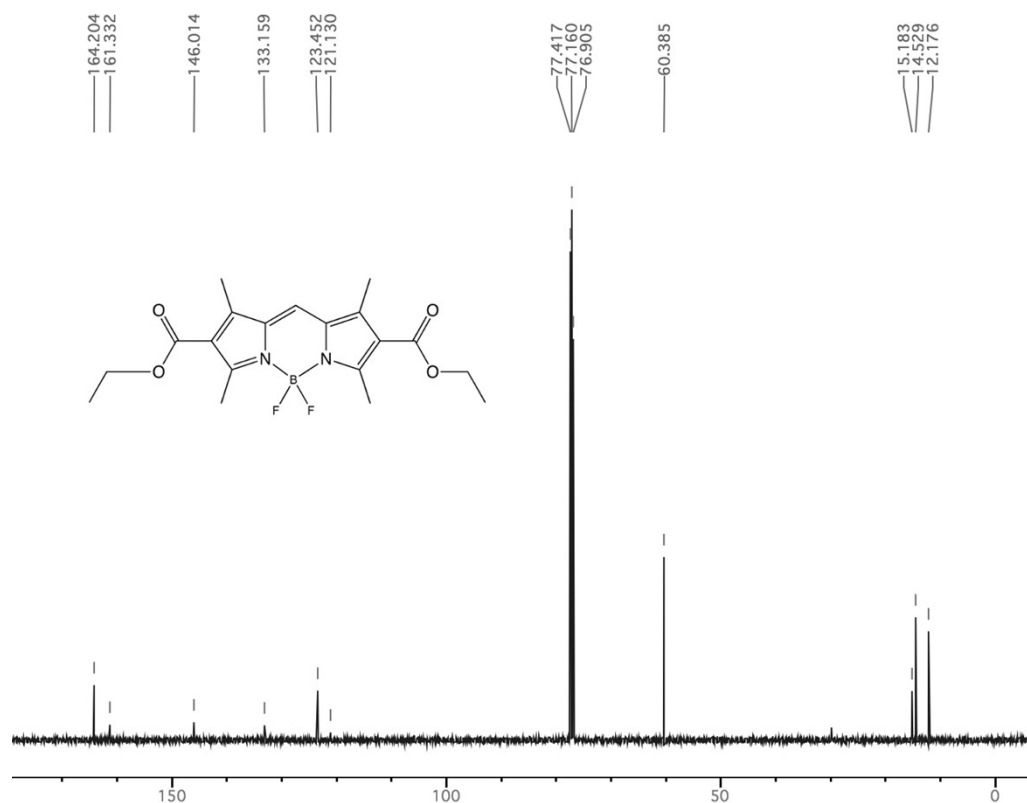

$^{11}\text{B}$  NMR; 160 MHz,  $\text{CDCl}_3$

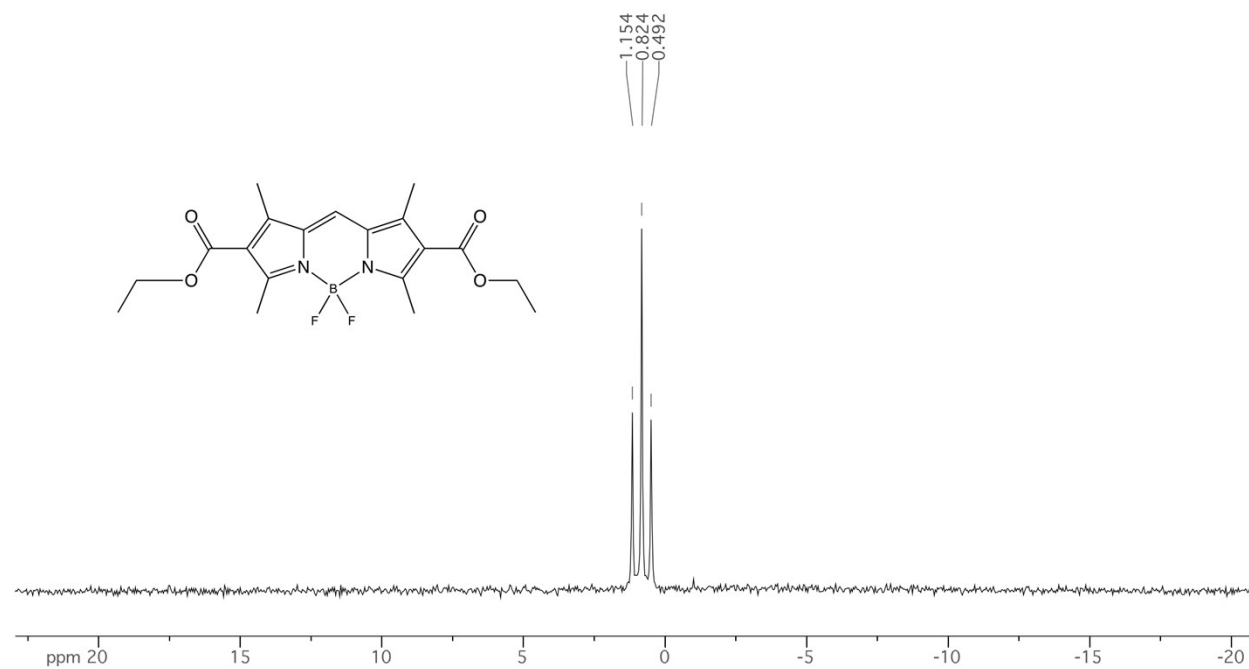

$^{19}\text{F}$  NMR; 470 MHz,  $\text{CDCl}_3$

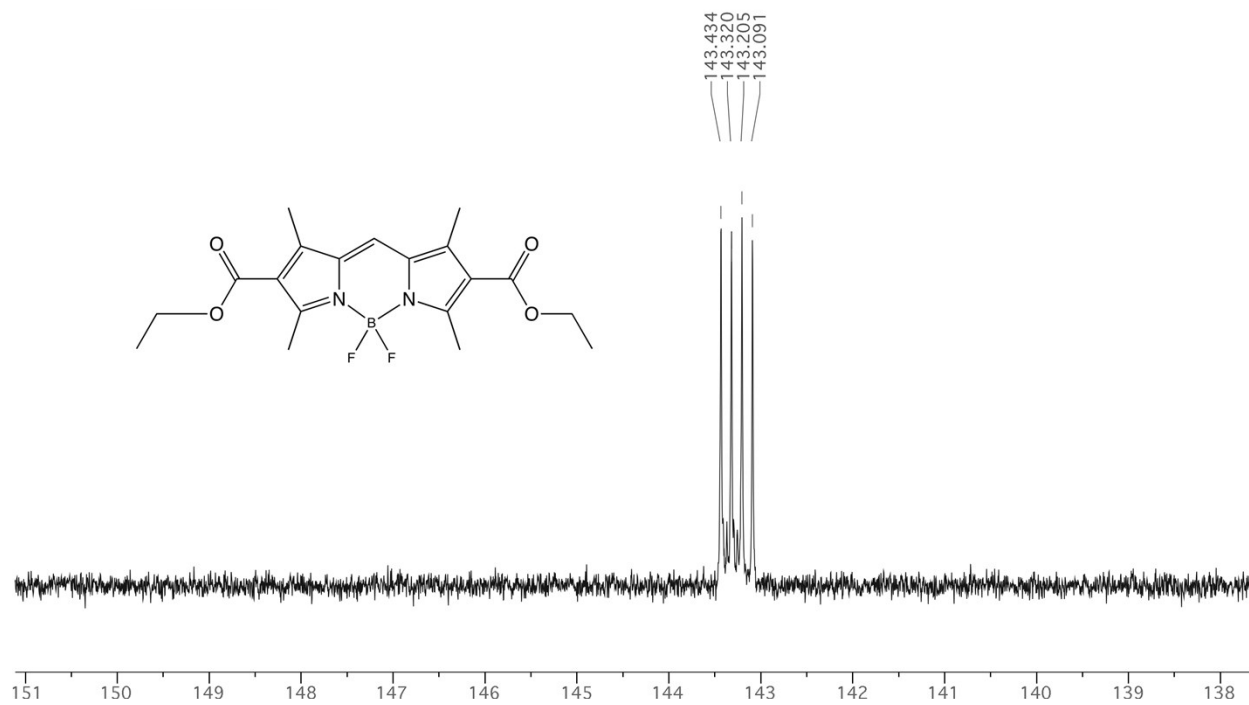

Supplement: c6ob02238c1.pdf [file c6ob02238c1.pdf]
